# Supplementary material for: Continuous glucose monitoring helps reduce hypoglycemia and improve control in insulin treated diabetic patients managed in primary care
Source: Research Square preprint supplement (doi:10.21203/rs.3.rs-7226274/v1), 2025-09-08
Supplement: Supplementary file 1 [file 1bb271af38a4e295e5c7b5b2.xlsx]

## Sheet: 工作表1
clinic	gander	age	pre A1c	pre hypoG	Post A1c	post hypoG	Chinese (0= no, 1= yes)	HT (0= no,1=yes,)	hyperlipidemia (0= no,1=yes)	obesity （0=no， 1= yes)	pre RFT (CKD-EPI (mL/min/1.73 m2))	pre Systolic Bp (mmHg)	pre Diastoic Bp (mmHg)	pre LDL (mmol/l)	pre BMI (kg/m2)	pre fasting glucose (mmol/l)	Pre urine albumin/creatinine ratio (mg/mmol)	post Systolic Bp (mmHg)	post Diastoic Bp (mmHg)	post LDL (mmol/l)	post BMI (kg/m2)	post fasting glucose (mmol/l)	post RFT (CKD-EPI (mL/min/1.73 m2))	post urine albumin/creatinine ratio (mg/mmol)
C1	M	60	9	4	8.9	0	1	1	1	0	79	135	68	2.5	21	4.6	0.9	137	65	2	20.9	4.4	73	3.1
C3	F	61	6.4	2	7	0	1	1	0	0	106	122	63	1.8	22.34	2.6	1.9	119	70	2.1	22.54	4	111	1.4
C5	F	52	7.1	4	7.9	2	0	1	1	1	102	123	71	1.7	31.72	3.6	0.7	126	62	2.1	31.59	5.2	102	2
C6	F	65	6.8	4	7.4	0	0	1	1	1	95	128	67	2.2	32.7	5.8	1.4	131	77	2.5	32.84	4.3	93	3
C7	F	65	6.8	2	7.3	1	0	0	1	0	90	108	56	1.3	24.6	3.4	0.8	110	59	1.3	24.76	4.4	95	0.8
C8	F	60	8.2	4	7.8	0	0	1	1	1	99	130	63	1.9	32.8	3.2	0.9	132	64	1.9	32.69	6.1	93	1.2
C9	F	55	5.6	10	6.2	0	0	1	1	1	80	116	73	1.9	39.47	3.9	0.7	120	76	2.1	40.2	5.3	79	0.9
C10	F	47	6.1	8	6.5	1	1	1	1	1	115	120	62	1.5	35.38	4.7	3.5	119	57	1.5	35.5	7.3	111	4.2
C11	M	52	7	12	6.5	0	0	1	1	0	90	121	76	1.2	21.5	5.9	0.3	129	78	1.2	21	4.3	90	0.3
C12	M	52	6.7	1	7.5	4	0	1	1	1	66	130	85	3.7	30.49	3.6	10.3	132	79	1.9	31.2	4.7	61	5.3
C13	M	64	6.6	8	6.2	0	1	1	1	1	74	144	75	1.1	25.46	3.8	0.5	128	62	1.3	24.26	4	70	0.7
C14	M	57	7.3	18	7.5	2	1	1	0	1	90	135	65	2	26.95	4.9	0.2	136	64	2.3	27.23	6.7	90	0.2
C15	F	65	8.8	6	8.5	0	1	1	1	1	90	130	45	2.2	28.5	3.1	0.3	129	67	1.8	24.3	9.4	87	0.4
C16	M	48	6.7	2	6.4	0	1	1	1	1	47	126	77	2.7	26.16	3.8	1.9	128	68	2.1	25.38	5.8	51	2.2
C17	M	55	6.6	6	7.1	0	1	1	1	1	22	119	62	2.6	30.52	3.5	2.98	129	77	2.3	30.32	6.3	15	4.27
C18	M	58	6.3	4	6.5	0	1	1	1	1	97	146	97	1.8	27.69	3.8	0.4	139	70	1.8	27.13	4.6	97	0.4
C19	F	61	7.4	4	8.4	1	1	0	1	0	81	129	69	0.8	23.81	3.9	0.3	127	66	0.8	24.54	4.6	74	0.3
C20	M	63	8.6	8	9.2	2	1	1	1	0	92	127	86	3.3	21.86	3.8	0.9	128	84	1.3	21.02	4.5	91	1
C22	M	56	6.5	20	6.8	6	1	1	1	1	76	137	77	1.9	26.56	4.1	0.7	138	71	2.1	25.89	6.1	70	0.7
C23	F	55	6.8	1	6.8	0	1	1	1	1	90	143	80	2	30.63	3.4	0.3	138	70	2	30.3	4	90	0.3
C24	M	53	6.8	6	6.9	0	1	0	1	1	101	136	82	2	26.34	3.9	1.7	132	79	1.7	27.1	4.6	100	1.8
C25	F	58	7.2	4	7.1	0	1	1	1	0	99	134	71	2.6	21.5	6.9	4.2	145	76	1.8	21.8	6.3	96	1.8
C26	M	53	8.1	20	8.7	8	1	0	1	1	50	137	58	2.5	26.4	2.9	222	133	74	2.6	27.2	5.3	50	230
C27	M	62	7.5	14	7.2	4	1	1	1	1	50	118	65	1.2	28.73	6	18.2	136	65	1.1	28.65	7.1	58	3.7
C28	M	64	8.1	0	10.9	0	1	1	1	1	90	137	67	2.3	25.16	3.8	5.4	139	73	2.1	26.09	15.9	90	6
C29	M	56	7.7	4	7.8	0	1	0	1	1	90	133	76	2.7	26.5	3.8	1.1	128	75	2.6	26.76	4.7	90	1.2
C31	M	60	6.8	8	8.3	0	1	1	0	0	80	116	81	2	21.65	3.8	1.8	118	67	1.8	21.8	7.9	86	1.8
C32	F	55	7.2	10	6.7	2	1	1	0	0	90	119	78	2.3	22.65	6	0.2	123	57	2.4	22.3	4.1	90	0.2
C34	F	64	6.3	4	6.6	0	1	1	1	1	78	124	69	1.9	30.86	3.9	1.2	147	75	2	30.67	4.1	86	1.5
C35	M	48	7.6	4	10.5	0	1	1	1	1	59	123	71	1.2	27.89	3.3	1.4	123	79	1.5	27.73	9.8	67	15.4
C36	F	57	7.3	2	8.8	0	1	1	1	1	84	129	59	2.1	28.5	7.3	3.3	153	73	2	28.23	3.6	80	3.4
C37	M	52	7.3	32	8.5	6	1	1	1	1	102	137	87	1.8	26.8	5.6	0.2	132	88	1.5	26.78	7.4	100	0.2
C38	M	60	7.5	8	7.6	0	1	0	1	1	91	107	62	1.7	25.1	3.1	0.5	110	67	1.8	26.85	3.3	92	0.5
C39	M	61	7.3	2	8.3	0	1	1	1	0	104	136	61	1.7	23.5	2.7	1.9	133	70	1.9	23.63	4.5	100	1.6
C44	F	58	8.2	6	8.1	0	1	1	1	0	103	120	61	1.4	23.1	2.8	1.7	123	66	2.1	23.05	4.8	100	1.1
C45	F	58	7.3	14	8.1	4	0	1	1	1	53	133	73	1.9	28.75	3.8	0.6	130	67	2.1	29.43	6.8	48	0.7
C49	M	62	6.6	4	7.3	0	1	0	1	0	77	126	64	2.3	23.6	2.8	1.8	132	72	2.3	22.83	5.5	97	5.8
C50	F	55	6.7	10	6.4	2	1	1	1	1	90	146	82	2.2	25.87	3.4	0.9	153	77	2.3	26.3	6.4	88	0.9
C52	F	64	6.8	4	7.5	0	1	0	0	0	92	121	65	2	21.65	2.2	0.3	127	63	2.3	22.34	5.2	93	0.3
C54	M	65	6.4	2	6.5	0	1	1	1	1	90	127	68	1.3	27.45	3.6	268	134	76	1.4	28.32	4.9	90	196
C56	F	65	7.2	24	6.9	8	1	0	1	1	96	124	65	3.7	26.4	3.6	0.8	126	61	1.5	27.23	5.3	94	1.5
C57	M	65	6.6	1	6.8	1	1	0	1	1	80	115	64	2.9	26.89	3.7	2.9	127	68	2	26.7	5.8	80	2.9
C58	M	65	7.5	4	8.3	0	1	1	1	1	69	126	76	2.1	27.65	3.8	0.2	128	85	2	27.89	4.3	66	0.3
C59	M	60	8.2	2	8.4	0	1	1	1	1	90	123	67	2.4	28.94	5.6	6.9	132	69	2.6	27.77	5.8	90	7
C60	F	57	8.9	6	9.9	4	1	0	1	1	96	128	74	1.8	29.56	3.8	0.4	134	59	1.9	29.76	6.4	97	0.6
C61	F	55	6.9	0	6.8	0	1	1	1	1	90	132	66	1.7	26.8	3.8	2.9	138	64	1.9	27.23	5.5	90	2.9
C63	M	60	7.8	1	9.2	0	1	1	1	1	61	109	61	2	31.23	4.4	6.7	98	70	2	30.07	9	74	2.6
C64	F	57	6.7	2	7.1	0	1	0	1	0	100	141	79	2.1	22.12	2.9	1.5	163	76	1.7	22.44	3.2	98	1.5
C65	F	58	7.1	6	8.8	0	1	0	1	0	90	107	54	2.3	22.73	3.6	0.2	126	72	2	23.12	10.1	90	0.2
C66	M	56	9	2	9.3	0	1	1	1	0	90	132	68	1.8	22.23	6.1	1.9	134	66	1.7	23.3	8.1	90	1.9
C68	F	60	8.4	4	8.5	0	1	0	1	1	90	101	61	2.2	26.93	5.8	0.2	115	62	2.1	27.12	5.2	90	0.2
C70	F	50	8.3	1	8.8	4	1	1	1	0	90	118	51	1.8	24.24	2.9	1.1	118	51	1.8	24.14	11	90	1.1
C71	M	63	7.4	8	9.6	0	0	1	1	1	95	124	61	1.3	27.31	3.6	11.9	123	50	1.9	25.69	15.1	93	11.8
C72	F	53	12.2	2	14.7	0	1	1	1	1	103	127	52	2.3	30.1	16.8	10.3	132	83	3	29	7.3	75	13.2
C73	F	61	6.8	1	6.8	4	1	0	1	1	93	110	68	1.7	26.17	3.8	1.9	110	68	1.9	24.65	5.5	86	2
C74	M	57	9.7	8	11.6	2	1	1	1	0	90	156	94	3	19.57	3	426	111	77	2.1	20.1	6.8	40	435
C75	F	62	6.8	1	7.5	0	1	1	1	0	95	151	75	2.9	21.09	3.3	0.9	149	67	1.6	21.48	4.9	94	1
C76	F	63	6.1	4	6.2	6	1	1	0	1	107	117	72	1.6	37.89	3	3.7	115	68	1.8	38.34	4	105	1.8
C78	M	38	6.3	6	6.2	8	1	1	1	1	98	123	85	1.7	37.2	3.4	2.4	124	72	1.9	36.76	4.5	98	2.4
C79	M	51	7	6	6.9	6	1	0	1	0	74	121	69	1.7	19.71	3.4	0.7	119	73	1.8	20.2	3.6	72	0.8
