# Supplementary material for: Continuous glucose monitoring helps reduce hypoglycemia and improve control in insulin treated diabetic patients managed in primary care
Source: Research Square preprint supplement (doi:10.21203/rs.3.rs-7226274/v1), 2025-09-08
Supplement: Supplementary file 2 [file 234047989e872533d60f48b1.xlsx]

## Sheet: 工作表1
clinic	gander	age	pre A1c	pre hypoG	Post A1c	post hypoG	Chinese (0= no, 1= yes)	HT (0= no,1=yes,)	hyperlipidemia (0= no,1=yes)	obesity （0=no， 1= yes)	pre RFT (CKD-EPI (mL/min/1.73 m2))	pre Systolic Bp (mmHg)	pre Diastoic Bp (mmHg)	pre LDL (mmol/l)	pre BMI (kg/m2)	pre fasting glucose (mmol/l)	Pre urine albumin/creatinine ratio (mg/mmol)	post Systolic Bp (mmHg)	post Diastoic Bp (mmHg)	post LDL (mmol/l)	post BMI (kg/m2)	post fasting glucose (mmol/l)	post RFT (CKD-EPI (mL/min/1.73 m2))	Post urine albumin/creatinine ratio (mg/mmol)
LLK2	F	57	6.8	30	7	0	1	1	1	1	106	124	68	1.9	32.47	4.8	1.2	135	71	1.9	31.5	7.7	104	1.3
LLK5	F	65	8.2	34	9.1	0	1	0	1	1	88	140	53	2.2	27.7	3.1	2.7	127	68	1.9	27.05	6.8	89	2.8
LLK6	M	65	8.5	24	8.8	0	1	1	0	1	43	135	86	2.5	25.2	14.3	7.2	130	80	2.5	24.34	18.3	43	7.3
LLK7	F	52	7.5	4	7.8	0	1	1	1	0	94	126	67	1.6	21.09	2.8	1.5	117	56	1.6	22.8	4.5	94	1.7
YMT2	F	58	10.5	8	10	0	1	0	1	0	90	102	65	4.1	19.52	10.9	3	116	69	2.1	19.48	5.3	90	3.2
YMT6	M	64	7.5	10	8.4	0	1	1	1	0	91	102	62	1.5	22.35	5.1	1.4	116	61	1.2	21.71	6.1	85	1.4
YMT9	M	50	6.1	6	7.1	0	0	1	1	1	71	142	78	1.9	30.86	3.8	2.5	112	69	2.1	30.93	12	69	2.5
YMT12	F	65	6.8	10	7	0	0	1	1	1	95	125	65	1.3	30.01	8.8	0.8	133	61	1.6	29.79	7.5	90	0.9
YMT13	M	46	12.6	20	11.6	0	0	1	1	1	108	133	89	2.6	25.54	9.9	2.8	137	85	2.4	25.82	10.9	100	3.2
YMT20	M	65	10.9	22	8.8	0	1	1	1	1	90	120	79	1.8	28.54	7.5	24.8	172	96	4.2	27.07	12.4	81	25.7
YMT17	M	60	7.7	38	7.9	0	1	1	0	0	90	130	81	2.4	22	7.1	0.3	125	60	2.4	22.12	7.9	78	0.4
YMT31	F	57	6.8	8	6.7	0	0	1	1	1	100	117	66	1.5	29.43	4	1.4	123	59	1.6	29.01	4.4	102	0.8
YMT32	M	53	7.5	4	7.7	0	1	1	1	1	55	120	78	1.8	31.12	5.6	12.1	125	75	1.8	30.32	7.5	50	14.7
YMT34	F	61	8.7	8	7.6	0	1	0	1	0	105	113	76	4.3	23.83	5.2	0.4	118	71	2.1	23.64	3.3	103	0.5
YMT35	M	51	6.6	30	6.6	0	1	1	1	1	100	128	77	0.9	28.76	5.3	0.2	126	87	1.8	28.54	5.1	88	0.2
YMT38	M	50	6.4	4	6.9	0	0	1	1	1	102	135	79	1.3	26.46	4.1	0.7	127	72	1.4	25.04	7.4	103	0.8
YMT39	F	52	9.3	16	8.7	0	1	1	1	1	90	125	76	2.9	32.14	15.5	2.8	115	65	1.8	32.07	10.8	101	3
YMT42	M	45	7.8	28	7	0	0	1	1	1	98	133	85	1.9	32.69	7.4	0.6	131	84	1.8	29.64	4	100	1
YMT43	M	37	9.4	14	11.1	0	0	1	1	1	105	122	87	2.1	28.97	4.5	0.5	139	90	2.1	27.91	4.5	103	0.6
YMT44	F	60	8.7	8	7.6	0	1	0	1	0	105	107	64	2.1	23.64	12.6	0.4	118	71	2.1	23.13	3.3	102	0.4
YMT45	M	53	12.1	22	13.2	0	0	1	1	0	92	116	80	1.1	21.65	16.9	2.7	99	71	1.5	20.59	17.8	89	36.8
YMT49	F	64	10.5	4	8.4	0	1	0	0	0	103	125	58	1.6	24.19	12.3	2.4	123	59	1.9	23.85	10.3	101	0.6
YMT50	F	63	9.6	12	9.8	0	1	0	1	0	79	105	56	3.7	20.95	7.5	1.6	109	53	1.2	21.53	6.3	88	1.8
YMT54	F	62	8.7	14	8.5	8	1	1	1	1	95	119	73	2	32.3	6.3	12.1	110	68	2.4	31.91	6.3	93	13.9
YMT56	F	64	7.7	4	8.8	0	1	1	0	1	84	126	84	1.4	25.04	5.6	0.3	115	65	1.4	25.96	5.6	85	0.3
YMT58	F	51	10.2	6	9.7	0	1	0	0	0	90	121	75	1.6	19.82	7.5	2.9	113	73	1.8	20.62	4.4	90	2.9
YMT59	M	43	7.4	4	7.4	0	0	1	1	0	120	118	87	2.3	22.3	6.4	1.2	128	83	1.8	22.67	5.8	116	1.1
YMT63	M	62	7.9	10	8.2	0.6	1	1	1	1	93	132	78	2.2	29.52	9.9	7.6	138	79	2.1	28.7	8	81	2.5
YMT66	M	65	7.4	26	6.7	0.6	1	1	1	1	67	129	56	0.9	29.16	4.9	61.5	158	58	1.2	29.97	6.8	57	89.6
YMT68	F	58	13.5	0	13.8	0	1	1	1	1	98	114	61	1.4	31.79	6.1	3.6	149	70	2.1	30.51	15.3	106	4.3
YMT71	M	57	6.5	4	6.6	0	1	0	1	0	80	119	78	1.7	24.02	5.4	0.7	122	72	1.7	24.02	4.5	79	0.9
YMT73	M	56	9.4	4	9.2	0	0	1	1	1	90	112	70	2.2	31.45	7.5	2.9	117	78	2.4	32.36	10.3	85	2.8
YMT74	F	56	10.3	24	8.9	1	1	0	1	0	107	103	68	1.4	18.92	4.8	2.1	119	81	1.4	21.36	3.8	106	8.7
YMT75	M	61	7.3	4	7.9	0.3	1	1	1	0	62	124	74	2.5	24.57	6.3	8.2	130	73	2.3	25.4	10.3	61	2.9
YMT76	M	65	7.3	12	7.9	1	1	1	1	1	90	128	62	1.4	28.36	10.1	0.3	128	61	1.4	28.77	8.8	93	0.3
YMT77	M	52	7.4	16	8.4	0	1	1	1	1	88	125	74	2.3	28.82	7.1	0.5	132	77	2.3	29	12.1	89	0.6
YMT79	M	54	8	2	8.9	0	1	1	1	1	95	124	79	2	32.6	9.2	76.8	126	77	2.5	33.45	7.7	94	46.5
YMT80	M	51	9.1	2	8.7	0	1	1	1	1	90	129	83	2.2	30.55	11.2	12.1	144	85	1.8	29.88	8.4	82	2.4
YMT81	M	64	7.9	2	7.3	0	1	1	1	0	91	118	61	2	22.61	5.1	0.3	128	57	1.6	22.61	7.3	90	0.3
YMT82	F	58	8.2	20	8.3	0	0	1	1	1	58	116	61	2	31.19	8.7	5.3	120	76	2	30.74	8.6	50	1.6
YMT87	F	60	10.8	8	11.2	1	1	0	1	0	96	96	65	2.1	19.52	6.9	0.3	88	57	2.4	20.07	6.2	97	0.3
YMT88	F	46	10.7	0	9.4	0	0	0	1	0	113	110	76	2	23.78	17.2	1.7	125	67	2.4	24.16	11.2	115	1.8
YMT95	M	46	9.5	16	7.6	0	0	1	1	1	104	129	92	1.9	25.79	21.1	2.9	163	90	1.4	25.65	8.6	96	3
EK1	M	47	10.6	2	8.9	0	1	1	1	1	66	133	88	1.6	31.07	10.5	8.6	118	82	1.7	32.35	9	78	8.5
EK3	M	63	8.9	2	7.6	0	1	1	1	1	90	141	87	1.8	27.47	8.1	4.9	117	60	1.4	28.16	7.8	94	3.8
EK4	M	64	7	1	7.6	0	1	1	1	1	87	122	71	1.3	25.43	3.5	3.9	139	72	1.5	25.27	10	94	3.4
EK6	M	40	11.6	2	7.7	1	1	1	1	1	28	138	90	2.6	41.88	11.3	218	135	76	2	43.9	6.4	23	265
EK7	F	63	9.2	2	7.8	1	1	1	1	1	74	124	74	2.1	27.93	9.8	3.7	123	72	1.8	29.65	5.1	75	2.9
EK8	F	52	7.1	0.6	7	0	1	1	1	1	96	124	61	2.1	29.99	6.3	0.3	130	67	2.3	30.23	5.8	92	0.3
EK9	M	35	13.5	2	6.9	0	1	1	1	1	111	114	66	2.9	29.49	20.6	5.8	127	84	3.5	34.31	6.5	48	54
EK10	M	62	7.3	2	7.4	1	1	1	0	1	90	130	89	1.2	27.62	7.8	26	142	78	2.5	29.63	6.5	90	13
EK11	M	65	6.5	2	6.9	4	1	1	1	0	36	129	68	2.2	24.8	3.9	0.3	125	58	1.9	24.31	7	34	0.3
EK12	F	61	8.6	4	6.1	1	1	1	1	1	63	120	59	1.8	25.61	7.1	2.1	144	76	1.9	25.09	4.8	63	2
EK13	M	62	8.1	2	7.8	0	1	1	1	0	83	118	73	2.4	23.54	6	0.29	112	68	1.6	21.52	5.5	66	3
EK15	M	49	7	1	6.5	0	1	0	1	0	102	118	78	2.3	22.76	3.8	1.1	123	76	1.7	22.54	5.5	76	0.8
EK17	F	51	12.3	2	8.8	1	1	1	0	0	103	141	86	1.8	22	3.5	1.9	132	67	2.4	27.39	4.5	100	2
EK19	M	60	7.5	2	7.2	0	1	1	1	0	71	161	86	1.8	22.76	5.9	0.4	129	71	1.8	23.46	6.5	56	0.3
RB1	M	64	7.2	2	7.9	0	1	1	0	0	90	126	78	2	24.68	2.2	0.7	137	76	2.3	24.8	6.3	83	0.7
RB3	F	59	10.4	10	9.1	0	1	0	0	1	72	130	78	2.5	25.67	7.8	0.3	155	91	2.6	25.48	6.2	77	0.3
